# Supplementary material for: Highly efficient light harvesting ruthenium sensitizers for dye-sensitized solar cells featuring triphenylamine donor antennas
Source: Royal Society of Chemistry journal article supplement (doi:10.1039/c3ta15134d), 2014-01-01
Supplement: c3ta15134d.pdf [file c3ta15134d.pdf]

Supporting information  
For Journal of Material Chemistry A

# Highly Efficient Light-Harvesting Ruthenium Sensitizer for Dye-Sensitized Solar Cells Featuring Triphenylamine Donor Antenna

Kun Cao <sup>[a]</sup>, Jianfeng Lu <sup>[a]</sup>, Jin Cui <sup>[a]</sup>, Yan Shen <sup>[a]</sup>, Wei Chen <sup>[a]</sup>, Getachew Alemu <sup>[a]</sup>, Zhong Wang <sup>[a]</sup>, Huailiang Yuan <sup>[a]</sup>, Jie Xu \* <sup>[b]</sup>, Mingkui Wang \* <sup>[a]</sup> and Yibing Cheng <sup>[c]</sup>

[a] Michael Grätzel Center for Mesoscopic Solar Cells, Wuhan National Laboratory for Optoelectronics, Huazhong University of Science and Technology, 1037 Luoyu Road, 430074 Wuhan, P. R. China. E-mail: mingkui.wang@mail.hust.edu.cn

[b] School of Materials Science and Engineering, Wuhan Textile University, FangZhi Road, 430073, Wuhan, P. R. China, E-mail: xujie0@mail.ustc.edu.cn

[c] Department of Materials Engineering, Monash University, Melbourne, Victoria, 3800, Australia

## Table of contents:

|                                                         |    |
|---------------------------------------------------------|----|
| 1. Synthesis routs of ancillary ligands KW-L1 and KW-L2 | P2 |
| 2. NMR and MS characterization of KW1 and KW2           | P2 |
| 3. IPCE spectra of devices with thin film thickness     | P4 |
| 4. Dark current measurement                             | P4 |

## 1. Synthesis routs of ancillary ligands KW-L1 and KW-L2

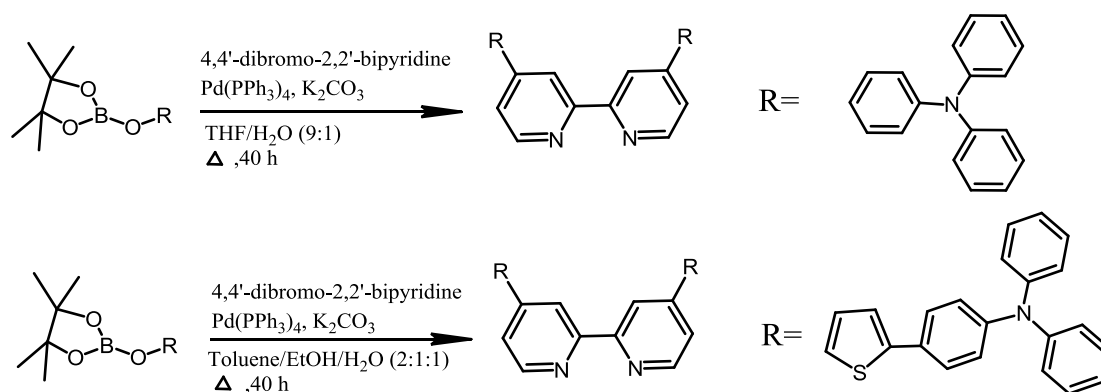

Scheme S1 Synthesis routs of ancillary ligands KW-L1 and KW-L2

## 2. NMR spectra and MS characterization of KW1 and KW2

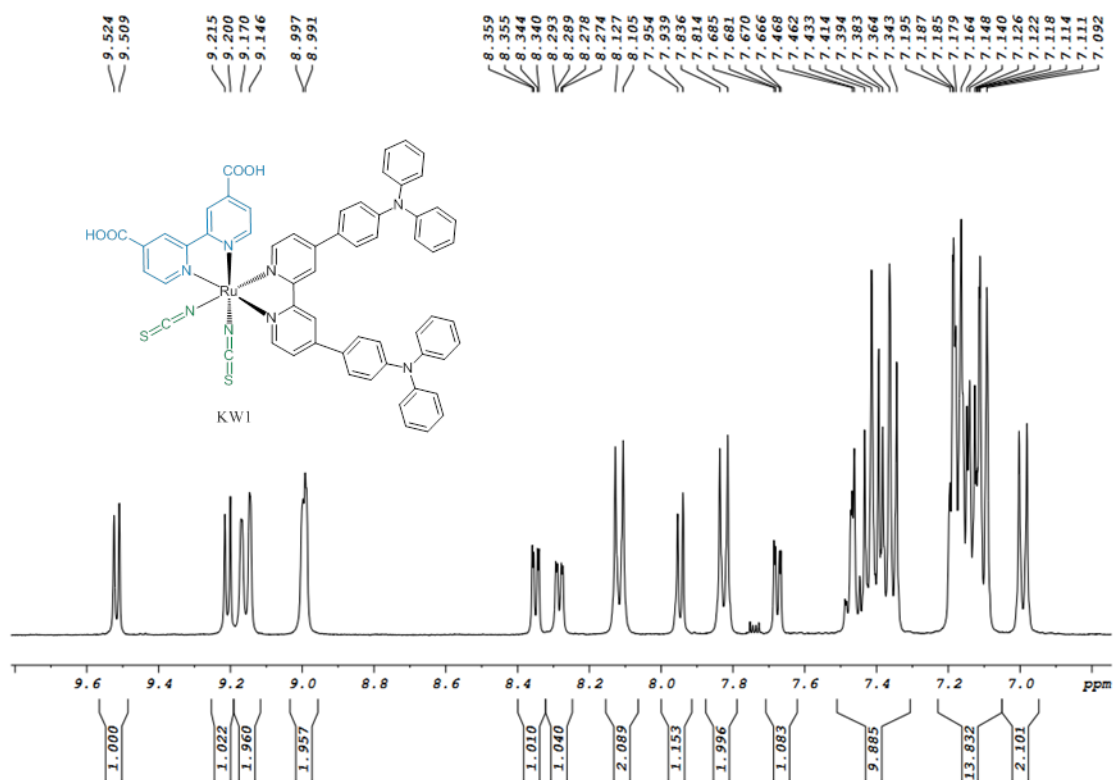

Figure S1 <sup>1</sup>H NMR spectrum of KW1 (400 MHz, DMSO-d<sub>6</sub>, 298 K).

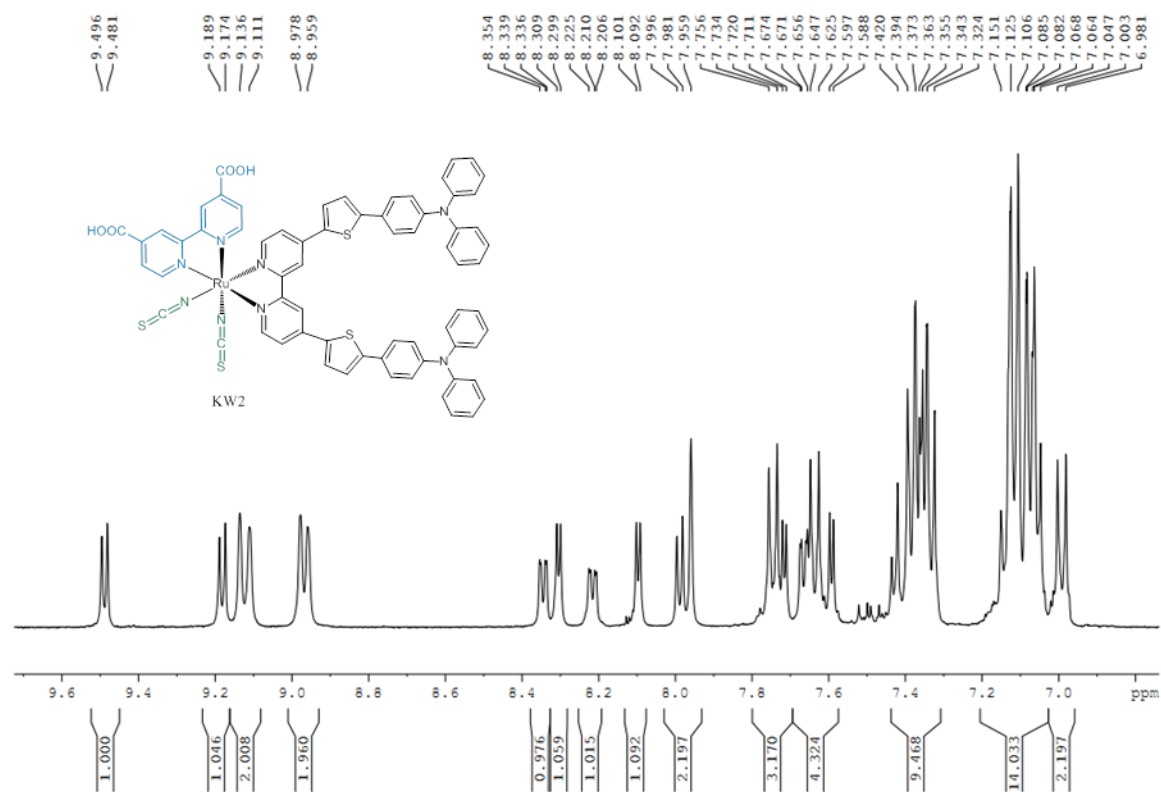

**Figure S2** <sup>1</sup>H NMR spectrum of KW2 (400 MHz, DMSO-d<sub>6</sub>, 298 K).

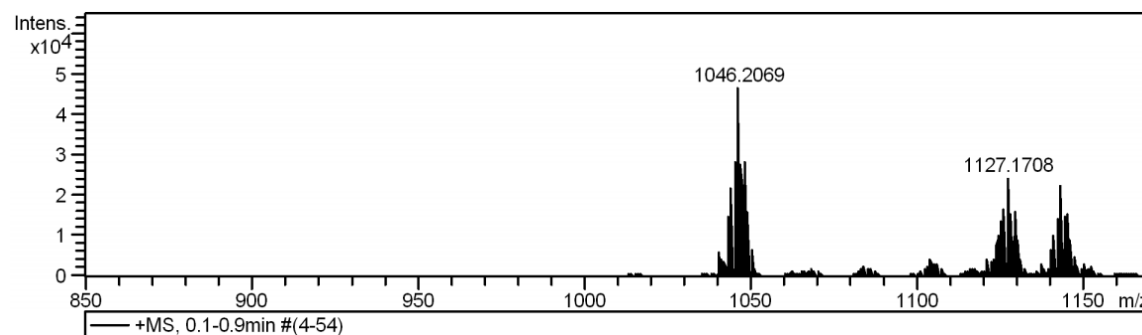

**Figure S3** High resolution mass data of KW1.

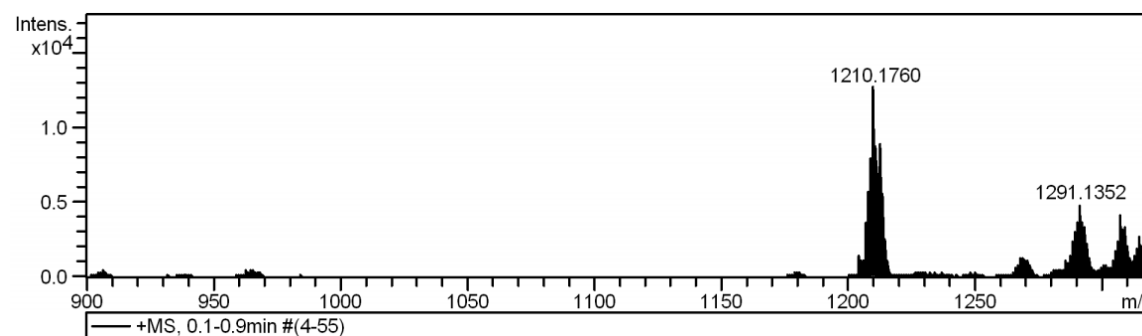

**Figure S4** High resolution mass data of KW2.

3. IPCE spectra of KW1 and KW2-sensitized devices with thin film thickness.

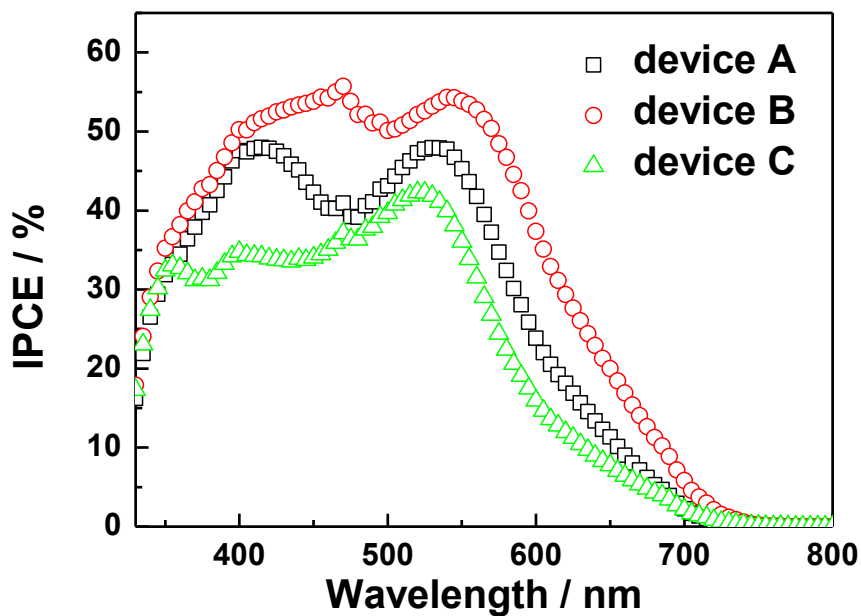

Figure S5 IPCE spectra of KW1 and KW2-sensitized devices with thin film thickness

4. Dark current measurement

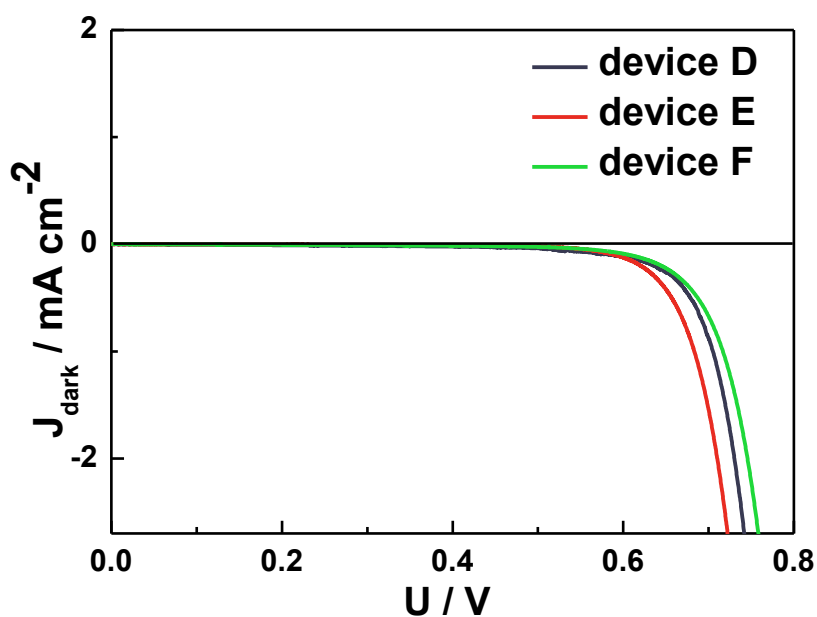

Figure S6 Dark-current data for devices D, E and F
